# Supplementary material for: c- and N-myc Regulate Neural Precursor Cell Fate, Cell Cycle, and Metabolism to Direct Cerebellar Development
Source: PubMed Central journal article supplement — Cerebellum. 2010 Jul 25;9(4):537–47. doi: 10.1007/s12311-010-0190-9 (PMC2996535; doi:10.1007/s12311-010-0190-9), 2010-07-25
Supplement: 12311_2010_190_MOESM1_ESM.pdf [file 12311_2010_190_MOESM1_ESM.pdf]

**Control**

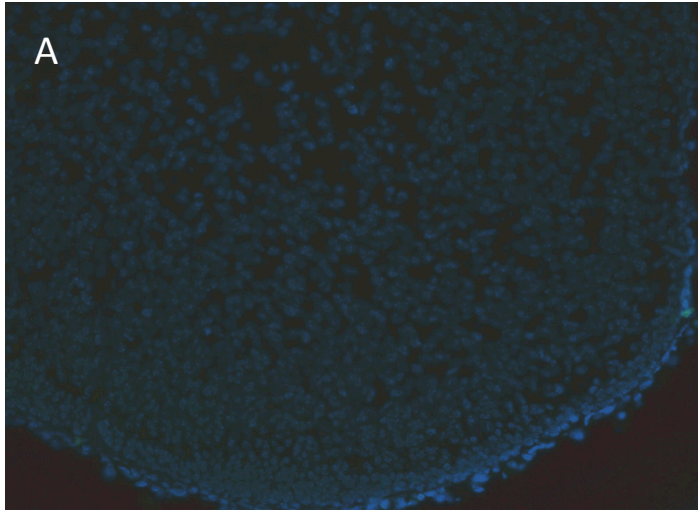

**DKO**

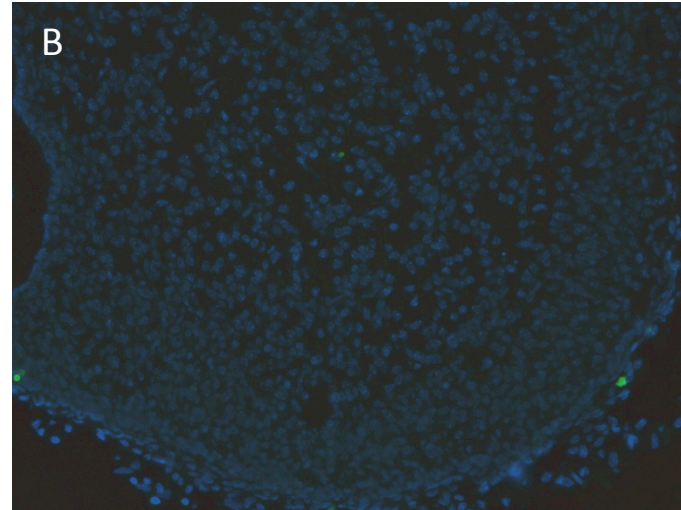

Legend: TUNEL staining of E17.5 cerebellum. DAPI (Blue), TUNEL (green).

**Control**

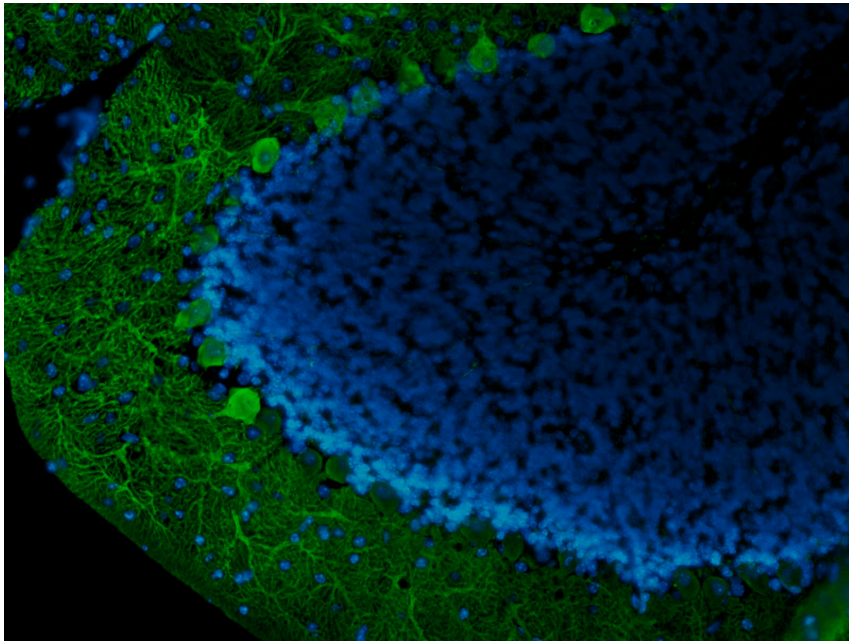

**DKO**

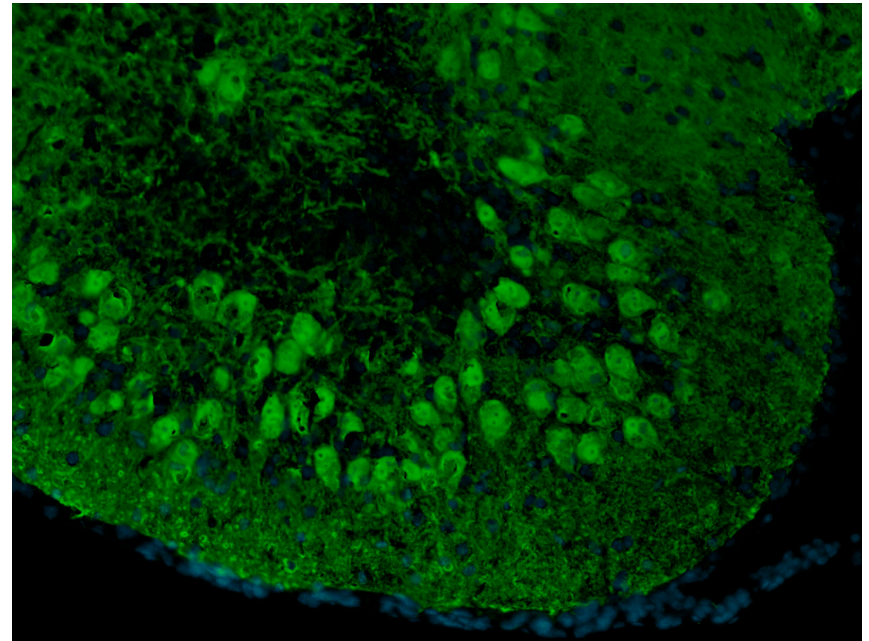

Legend: BTUJ (green) staining of control and DKO mature cerebellum. Both sections were stained with DAPI (Blue), only apparent in the DKO as a putative residual EGL.

Figure S2  
Wey, et al.

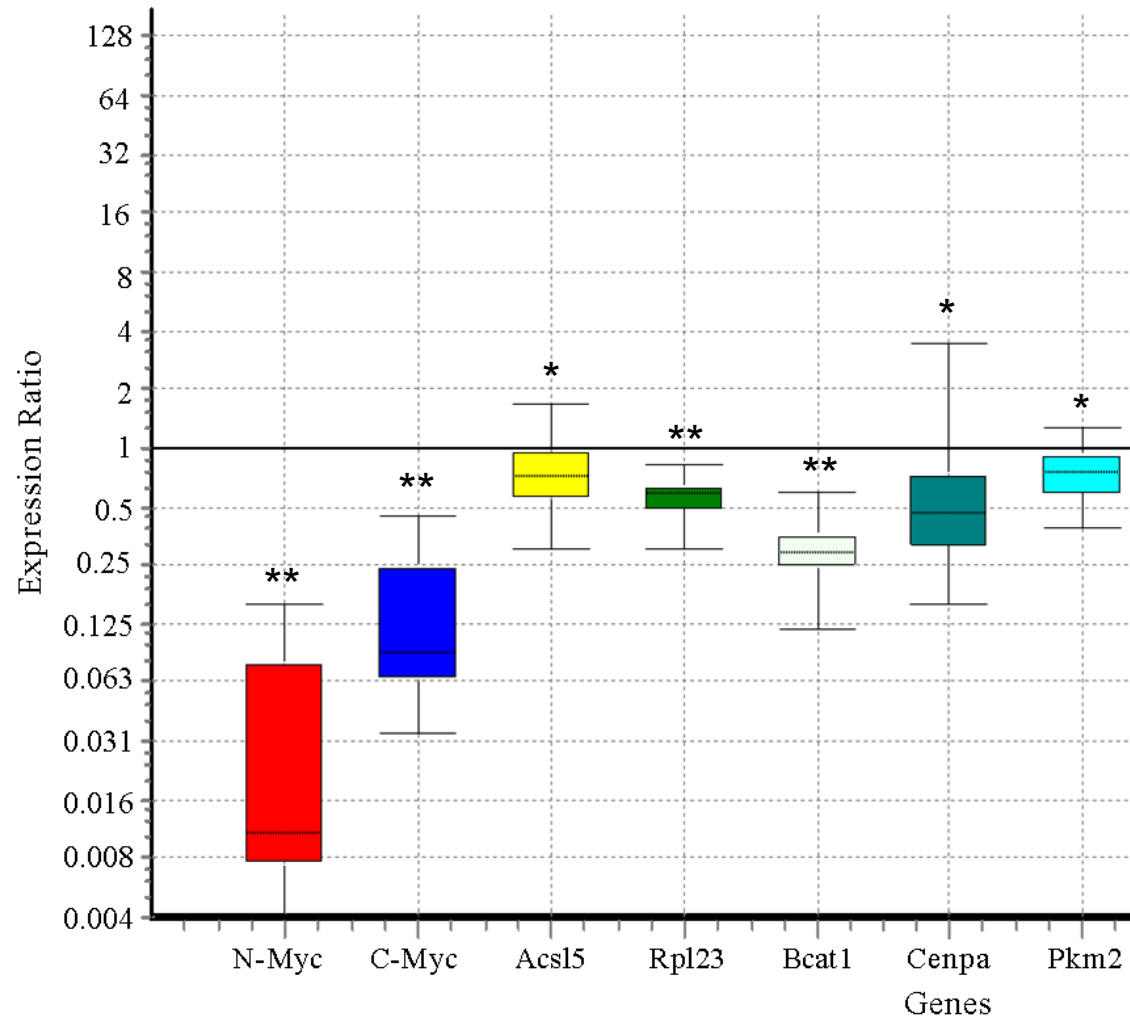

**q RT-PCR validation of downregulated genes in the DKO cerebella.** \* Indicates samples are statistically significant with a  $p < 0.05$ , while \*\* Indicates samples have a  $p < 0.005$ . Error bars are standard deviations. Mean results are displayed from 3 (DKO) and 4 (control) biological replicates, with control values set to 1.0.

Figure S3  
Wey, et al.

## Down in all 3 domains

|               | Forebrain | Midbrain | Cerebellum |
|---------------|-----------|----------|------------|
| 1500012F01Rik | 1.953545  | 1.330658 | 1.799071   |
| 2410015N17Rik | 1.380956  | 1.320027 | 1.608744   |
| 2610206B13Rik | 1.68608   | 1.687102 | 1.681078   |
| 2610528E23Rik | 1.389473  | 1.326666 | 1.320036   |
| 2810417H13Rik | 1.832888  | 1.369072 | 2.944132   |
| Adk           | 1.652339  | 1.4379   | 1.51814    |
| AI838661      | 1.34915   | 1.571047 | 1.650312   |
| Akr1c19       | 2.58958   | 2.173496 | 1.547631   |
| Arbp          | 1.45569   | 1.39505  | 1.414541   |
| Atp6v1d       | 1.487886  | 1.354029 | 1.306473   |
| C77032        | 1.453379  | 1.30675  | 1.431214   |
| Fbxl3a        | 1.75876   | 1.573825 | 1.556751   |
| Ldh1          | 1.374228  | 1.361858 | 1.505528   |
| LOC544988     | 2.659666  | 2.932711 | 1.993356   |
| LOC545007     | 2.632969  | 2.267968 | 2.147624   |
| LOC545013     | 2.181864  | 2.174951 | 1.502957   |
| Mapk8         | 1.389015  | 1.352758 | 1.304919   |
| Picalm        | 1.914126  | 1.923121 | 1.581222   |
| Pkm2          | 1.998208  | 1.608084 | 1.756061   |
| Ptpre         | 1.517021  | 1.394027 | 1.513023   |
| Rcl1          | 1.411821  | 1.358058 | 1.420385   |
| S100a8        | 1.359795  | 1.41392  | 2.362404   |
| Usp29         | 1.540584  | 2.214131 | 1.464458   |

## Up in all 3 domains

|               | Forebrain | Midbrain | Cerebellum |
|---------------|-----------|----------|------------|
| 1700009P17Rik | 0.70      | 0.76     | 0.69       |
| 4933427D14Rik | 0.60      | 0.47     | 0.73       |
| Atbf1         | 0.75      | 0.69     | 0.69       |
| BC065120      | 0.61      | 0.53     | 0.65       |
| Cap1          | 0.61      | 0.57     | 0.59       |
| Colla2        | 0.73      | 0.68     | 0.54       |
| Cops8         | 0.50      | 0.49     | 0.48       |
| D14Ertd449e   | 0.57      | 0.59     | 0.49       |
| Esd           | 0.72      | 0.62     | 0.70       |
| H2afj         | 0.72      | 0.65     | 0.72       |
| LOC73072      | 0.56      | 0.43     | 0.60       |
| Mrc1          | 0.77      | 0.71     | 0.52       |
| Ptprt         | 0.73      | 0.76     | 0.76       |
| Rgs5          | 0.56      | 0.60     | 0.57       |
| Wnt5a         | 0.67      | 0.76     | 0.55       |
| Zcchc3        | 0.70      | 0.71     | 0.73       |
| Zfp330        | 0.67      | 0.62     | 0.71       |

**Mean array data (Control/DKO ratio) for annotated genes with expression changes in fore and midbrain as well as cerebellum.**

Figure S4  
Wey, et al.
